# **An Ancestry Based Approach for Detecting Interactions**

Danny S. Park<sup>1\*</sup>, Itamar Eskin<sup>2</sup>, Eun Yong Kang<sup>3</sup>, Eric R. Gamazon<sup>4,5</sup>, Celeste Eng<sup>6</sup>, Christopher R. Gignoux<sup>1,7</sup>, Joshua M. Galanter<sup>6</sup>, Esteban Burchard<sup>1,6</sup>, Chun J. Ye<sup>8</sup>, Hugues Aschard<sup>9</sup>, Eleazar Eskin<sup>3</sup>, Eran Halperin<sup>2</sup>, Noah Zaitlen<sup>1,6\*</sup>

## **Affiliations:**

1. Department of Bioengineering and Therapeutic Sciences. University of California San Francisco. San Francisco, CA.
2. The Blavatnik School of Computer Science. Tel-Aviv University. Tel Aviv, Israel.
3. Department of Computer Science. University of California Los Angeles. Los Angeles, CA.
4. Division of Genetic Medicine, Department of Medicine. Vanderbilt University. Nashville, TN.
5. Academic Medical Center, University of Amsterdam, Amsterdam, The Netherlands
6. Department of Medicine. University of California San Francisco. San Francisco, CA.
7. Department of Genetics. Stanford University. Palo Alto, CA.
8. Institute of Human Genetics. University of California San Francisco. San Francisco, CA.
9. Department of Epidemiology. Harvard School of Public Health. Boston, MA.

\* Corresponding Author

Email: [danny.park@ucsf.edu](mailto:danny.park@ucsf.edu), [noah.zaitlen@ucsf.edu](mailto:noah.zaitlen@ucsf.edu)

## I. Abstract

Background: Epistasis and gene-environment interactions are known to contribute significantly to variation of complex phenotypes in model organisms. However, their identification in human association studies remains challenging for myriad reasons. In the case of epistatic interactions, the large number of potential interacting sets of genes presents computational, multiple hypothesis correction, and other statistical power issues. In the case of gene-environment interactions, the lack of consistently measured environmental covariates in most disease studies precludes searching for interactions and creates difficulties for replicating studies.

Results: In this work, we develop a new statistical approach to address these issues that leverages genetic ancestry in admixed populations. We applied our method to gene expression and methylation data from African American and Latino admixed individuals respectively, identifying nine interactions that were significant at  $p < 5 \times 10^{-8}$ , we show that two of the interactions in methylation data replicate, and the remaining six are significantly enriched for low p-values ( $p < 1.8 \times 10^{-6}$ ).

Conclusion: We show that genetic ancestry can be a useful proxy for unknown and unmeasured covariates in the search for interaction effects. These results have important implications for our understanding of the genetic architecture of complex traits.

Keywords: Gene-environment interaction, gene-gene interactions, admixture

45

## 46 II. Background

47 Genetic association studies in humans have focused primarily on the identification of  
 48 additive SNP effects through marginal tests of association. There is growing evidence that both  
 49 epistatic and gene-environment ( $G \times E$ ) interactions contribute significantly to phenotypic variation  
 50 in humans and model organisms[1-5]. In addition to explaining additional components of missing  
 51 heritability, interactions lend insights into biological pathways that regulate phenotypes and improve  
 52 our understanding of their genetic architectures. However, identification of interactions in human  
 53 studies has been complicated by the computational and multiple testing burden in the case  
 54 of epistatic interactions, and the lack of consistently measured environmental covariates in the case  
 55 of  $G \times E$  interactions[6,7].

56 To overcome these challenges, we leverage the unique nature of genomes from recently  
 57 admixed populations such as African Americans, Latinos, and Pacific Islanders. Admixed genomes are  
 58 mosaics of different ancestral segments[8] and for each admixed individual it is possible to  
 59 accurately estimate  $\theta$ , the proportion of ancestry derived from each ancestral population (e.g. the  
 60 fraction of European/African ancestry in African Americans)[9]. Ancestry has been previously  
 61 leveraged to demonstrate that an array of environmental and biomedical covariates are correlated  
 62 with  $\theta$  [10-20] and we therefore consider its use as a surrogate for unmeasured and unknown  
 63 environmental exposures.  $\theta$  is also correlated with the genotypes of SNPs that are differentiated  
 64 between the ancestral populations, suggesting that  $\theta$  may be effectively used as a proxy for detecting  
 65 multi-way epistatic interactions. Therefore, we propose a new SNP by  $\theta$  test of interaction in order to  
 66 detect evidence of interaction in admixed populations.

67 We first investigate the properties of our method through simulated genotypes and  
 68 phenotypes of admixed populations. In our simulations we demonstrate that differential linkage-  
 69 disequilibrium (LD) between ancestral populations can produce false positive SNP by  $\theta$  interactions  
 70 when local ancestry is ignored. To accommodate differential LD, we include local ancestry in our  
 71 statistical model and demonstrate that this properly controls this confounding factor. We also show

that our approach, the Ancestry Test of Interaction with Local Ancestry (AITL), is well-powered to detect  $G \times E$  interactions when  $\theta$  is correlated with the environmental covariates of interest and multi-way epistatic interactions. The power for detecting pairwise  $G \times G$  interactions at highly differentiated SNPs is lower than direct interaction tests even after accounting for the additional multiple testing burden. However, the results of our simulations show that AITL is well powered to detect multi-way epistasis involving tens or hundreds of SNPs of small effects, not detectable by pairwise tests.

We first examined molecular phenotypes by applying our method to gene expression data from African Americans, as well as DNA methylation data from Latinos. Gene expression traits have previously been shown to have large-scale differences as a function of genetic ancestry[13]. Other molecular phenotypes, such as LDL levels, have also been shown to be associated with genetic ancestry [13,16,21-24]. For gene expression in particular, Price *et al.* showed that the effects of ancestry on expression are widespread and not restricted to a handful of genes. Additionally, molecular phenotypes are often used in deep phenotyping and Mendelian randomization studies and are thus directly relevant to elucidating disease biology[25,26].

We identified one genome-wide significant interaction ( $p < 5 \times 10^{-8}$ ) associated with gene expression in the African Americans and eight significant interactions ( $p < 5 \times 10^{-8}$ ) associated with methylation in the Latinos. Two of the eight interactions associated with DNA methylation in the Latinos also replicated and the remaining six were enriched for low p-values ( $p < 1.8 \times 10^{-6}$ ). To demonstrate that our approach works in larger data sets we also applied AITL to asthma case-control data from Latinos and observed well-calibrated test statistics. Together, these results provide evidence for the existence of interactions regulating expression and methylation and show that our approach is statistically sound.

### III. Results

#### Simulated Data

To determine the utility of using  $\theta$  as a proxy for unmeasured and unknown environmental covariates, we applied the AITL to simulated 2-way admixed individuals. We tested  $\theta_1$ , the proportion of ancestry from ancestral population 1, for interaction with simulated SNPs (see Simulation Framework). Power was computed over 1,000 simulations, assuming 10,000 SNPs being tested, and using a Bonferroni correction p-value cutoff of  $5 \times 10^{-6}$ . We calculated the power using assumed interaction effect sizes (either  $\beta_{G \times G}$  or  $\beta_{G \times E}$ ) of 0.1, 0.2, 0.3, and 0.4 (see Simulation Framework). Although the few interactions reported for human traits and diseases have smaller effects in terms of the phenotypic variance they explain, we simulated large effects because genetic and environmental effect sizes in omics data, such as the expression and methylation data considered here, are known to be of larger magnitude. For example, some cis-eQTL SNPs explain up to 50% of the variance of gene expression[27]. However for most phenotypes, known interactions will explain a very small proportion of the phenotypic variance, mainly due to the fact that so few interactions have been identified and replicated[28].

#### *Power When Using $\theta$ as a Proxy for Highly Differentiated SNPs*

To determine whether using  $\theta$  as a proxy for highly differentiated SNPs is more powerful than testing all pairs of potentially interacting SNPs directly, we simulated two interacting SNPs in 1000 admixed individuals (see Simulation Framework). We then tested for an interaction using AITL by replacing the genotypes at the highly differentiated SNP with  $\vec{\theta}_1$ . We observed that even with moderate effect sizes, using  $\theta$  in place of the actual genotypes does not provide any increase in power even after accounting for multiple corrections (see Figure 1a). This is in agreement with recent work showing the limited utility of local ancestry by local ancestry interaction test to identify underlying SNP by SNP interaction when genotype data are available[29]. For the larger effect sizes we simulated, we do see power increasing as the delta between ancestral frequencies increases. The plots show that AITL has little power unless the effect was very strong. Figure 1b reveals that even with the multiple correction penalty, testing all pairwise SNPs directly is always more powerful. We note that when testing the interacting SNPs directly, we used a cutoff p-value of  $1 \times 10^{-9}$  since in theory we were testing all unique pairs of 10,000 SNPs. Based on these results, we would

recommend testing for pairs of interacting SNPs directly if pairwise  $G \times G$  interactions are a subject of interest in the study.

However, when multi-way interactions are considered, AITL may become more powerful since differentiated SNPs across the genome will be correlated with genetic ancestry. These simulations are important as other studies have suggested that higher order interactions may be important for some traits[1,30,31]. To evaluate the ability of  $\theta$  to serve as a proxy for multiple (independent) differentiated SNPs, we simulated a scenario where a candidate SNP  $z$  had interactions with  $m$  SNPs (see Simulation Framework). For each interaction, we assumed a small interaction effect size ( $\beta_{G \times G} = 0.025$ ), which would not be detectable using a pairwise approach, as we demonstrated in the pairwise simulation. Figure 2 shows that AITL is better powered to detect the existence of interactions than a pairwise approach in the presence of multiple interacting SNPs with a candidate SNP.

#### *Power When Using $\theta$ as a Proxy Environmental Covariate*

When assessing the utility of  $\theta$  as a proxy for an environmental covariate  $E$ , we simulated 3000 individuals.  $E$  was simulated such that it was correlated with the global ancestries in varying degrees (see Simulation Framework). Figure 3 shows the power of the AITL as a function of the Pearson correlation between  $\vec{\theta}_1$  and  $E$ . The power of testing  $E$  directly is exactly the power of the AITL when the correlation is equal to 1. As expected, as the correlation increases, the power increases as well. When the effect size is 0.1, the power to detect a  $G \times E$  interaction is low whether one uses  $\theta_1$  or  $E$ . However, both tests are much better powered for effect sizes greater or equal to 0.2, with the AITL's power being dependent on the level of correlation. Note that using  $\theta$  as a proxy for  $E$  is equivalent to testing  $G \times E$  in the presence of measurement error. Under the assumption of non-differential error with regard to the outcome (e.g. the correlation between  $\theta$  and  $E$  is equal among cases and control) such a test is underpowered but has a controlled type I error rate under the null[32].

#### *Differential LD*

To demonstrate that differential LD has the potential to cause inflated test-statistics, we ran 10,000 simulations of 1000 admixed individuals. For each individual we simulated 2 SNPs, a causal SNP and a tag SNP. The LD between the tag SNP and causal SNP was different based on the ancestral background the SNPs were on (see Simulation Framework). Over 10,000 simulations, we computed the mean  $\chi^2_1$  test-statistic for the AIT and the AITL. We note that the phenotypes for these simulations were generated under a model that assumed no interaction. We observed a mean  $\chi^2_1 = 0.996$  with a standard deviation of 1.53 for AITL. AIT, which does not condition on local ancestry, had a mean  $\chi^2_1 = 3.59$  with a standard deviation of 3.60. We also looked at genomic control  $\lambda_{GC}$ , the ratio of the observed median  $\chi^2$  over the expected median  $\chi^2$  under the null[33].  $\lambda_{GC}$  compares the median observed  $\chi^2$  test-statistic versus the true median under the null. In our simulations, we observed  $\lambda_{GC} = 5.81$  for AIT and  $\lambda_{GC} = 0.980$  for AITL (see Supplementary Figure S1). Last, we computed the proportion of test-statistics that passed a p-value threshold of .05 and .01 in our simulations. The AIT had 3687 statistics passing a p-value of .05 and 1687 at a threshold of .01, whereas AITL had 464 and 96 at the same p-value thresholds. The results for AITL are as expected under a true null. The results from our simulations show that not accounting for local ancestry can result in inflated test-statistics and can potentially lead to false positive findings.

## Real Data

### *Coriell Gene Expression Results*

We first applied our method to the Coriell gene expression dataset[34]. The Coriell cohort is composed of 94 African-American individuals and the gene expression values of ~8800 genes in lymphoblastoid cell lines (LCLs). Since African Americans derive their genomes from African and European ancestral backgrounds, we tested for interaction between a given SNP and the proportion of European ancestry,  $\theta_{EUR}$ . Each SNP by  $\theta_{EUR}$  term was tested once for association with the expression of the gene closest to the SNP. We observed well-calibrated statistics with a  $\lambda_{GC}$  equal to 1.04 (see Supplementary Figure S2). In the LCLs, we found that interaction of rs7585465 with  $\theta_{EUR}$  was associated with ERBB4 expression (AITL  $p = 2.95 \times 10^{-8}$ , marginal  $p = 0.404$ ) at a genome-wide significant threshold ( $p \leq 5 \times 10^{-8}$ ). rs7585465 has a 'C' allele frequency of 0.218 in the Coriell data

and appears to be differentiated between CEU and YRI with allele frequencies of 0.619 and 0.097 in the respective populations.

Given that the gene expression values come from LCLs (all cultured according to the same standards), the SNPs may be interacting with epigenetic alterations due to environmental exposures that have persisted since transformation into LCLs. This scenario is unlikely, and we believe that signals are driven by multi-way epistatic interactions. In our simulations, we showed that using  $\theta$  as a proxy for a single highly differentiated SNP is underpowered compared to testing all pairs of potentially interacting SNPs directly. However, there are many SNPs that are highly differentiated across the genome with which  $\theta$  will be correlated. It is therefore possible that  $\theta$  is capturing the interaction between the aggregate of many differentiated trans-SNPs (i.e. global genetic background) and the candidate SNP. This is consistent with a recently reported finding, conducted in human iPS cell lines, that genetic background accounts for much of the transcriptional variation[2,35].

Although we believe the ERBB4 result to be representative of multi-way epistasis, we performed a standard pairwise interaction test (see Methods) to check for interaction between rs7585465 and other SNPs genome-wide. Interestingly, we found that the standard interaction test (see Methods) showed substantial departure from the null with a  $\lambda_{GC}$  equal to 1.8 (see Supplementary Figure S3). Since the interaction of rs7585465 by  $\theta$  was significant, the pairwise interaction test-statistics of rs7585465 by any SNP  $j$  can be inflated if  $j$  is correlated with  $\theta$ . We found that including the original significant SNP by  $\theta$  term in the null (see Methods) brought the  $\lambda_{GC}$  down to 1.05, and controlled for such scenarios in this dataset (See Supplementary Figure S3). As we had previously anticipated, identifying the exact interactions driving the SNP by  $\theta$  interaction proved to be difficult. We found one borderline significant SNP (rs4839709,  $p = 3.08 \times 10^{-7}$ ) but no interactions that passed genome-wide significance. These results are consistent with what we have observed in simulations, in which even though a standard pairwise interaction test is underpowered to detect interactions, AITL is able to identify the main locus involved in a multi-way interaction.

*GALA II Case-Control*



To determine if our method is biased in large structured GWAS data, we applied AITL to case-control data from a study of asthmatic Latino individuals called the Genes-environments and Admixture in Latino Americans (GALA II)[36]. The dataset includes 1158 Mexicans and 1605 Puerto Ricans, which were analyzed separately. Case status was assigned to individuals if they were between the ages of 8 and 40 years with a physician-diagnosed mild to moderate-to-severe asthma. Additionally, they had to have experienced 2 or more asthma related symptoms in the previous 2 years at the time of recruitment[37]. In the Mexicans and Puerto Ricans there were 548 and 797 cases, respectively. In our analysis, we also included BMI, age, and sex as additional covariates. We observed well-calibrated statistics with a  $\lambda_{GC}$  equal to 1.00 and 0.98 in the Mexicans and Puerto Ricans, respectively (see Supplementary Figure S5). In contrast to the molecular phenotype data, searches for interactions in these phenotypes did not yield any findings passing genome-wide significance. This is consistent with previous disease studies that have failed to find many replicable interactions in disease studies[28]. In the data here, the lack of any findings may be due to the relatively small sample size or because the effects of the interactions are extremely small (if they exist for covariates correlated with  $\theta_{EUR}$ ).

#### *GALA II Methylation Results*

We searched for interactions in methylation data derived from a study of GALA II asthmatic Latino individuals[36]. The methylation data is composed of 141 Mexicans and 184 Puerto Ricans. As the phenotype, we used DNA methylation measurements on ~300,000 markers from peripheral blood. As we had done with gene expression, we tested for interaction between a given SNP and  $\theta_{EUR}$  using AITL. All SNPs within a 1 MB window centered around the methylation probe were tested. We used the European component of ancestry because it is the component shared most between Mexicans and Puerto Ricans (see Table 1). We observed well-calibrated test-statistics with  $\lambda_{GC}$  equal to 1.06 in the Mexicans and 0.96 in the Puerto Ricans (see Supplementary Figure S6). We tested 128,794,325 methylation-SNP pairs, which result in a Bonferroni corrected p-value cutoff of  $3.88 \times 10^{-10}$ . However, this cutoff is extremely conservative given the tests are not independent. We therefore report all results that are significant at  $5 \times 10^{-8}$  in either set as an initial filter. We found 5

interactions in the Mexicans and 3 in the Puerto Ricans that are significant at this threshold (see Table 2).

Unlike the Coriell individuals, who are 2-way admixed, the GALA II Latinos are 3-way admixed and derive their ancestries from European, African, and Native American ancestral groups. Consequently, to confirm that incomplete modeling or better tagging on one of the non-European ancestries was not driving the results, we retested all significant interactions including a second component of ancestry for AITL. In the case of the Mexicans, we included African and European ancestry, and in the case of the Puerto Ricans, we included European and Native American ancestry. Even after adjusting for the second ancestry the interactions between SNP and  $\theta_{EUR}$  remained highly significant (see Supplementary Table 1).

As we did for the gene expression data, we attempted to identify pairwise interactions involved in the methylation data results. For each genome-wide significant result, we performed a standard pairwise interaction test of all SNPs with the original SNP found to be significant with AITL. We were unable to identify any significant interactions after applying genomic control to the results. For all tests, we included the significant SNP by  $\theta$  term (see Methods) in the null. For this dataset, unlike the gene expression data, we observed substantial remaining departure from the null (see Supplementary Table S2) even after including the original significant SNP by  $\theta$  term, suggesting there may be other factors that need to be accounted for when testing for interactions in admixed populations. The results from our pairwise scan are what we would anticipate, given that in simulations only AITL (not the standard pairwise interaction test) was able to identify the main locus involved in the multi-way interaction.

We then performed a replication study of the significant Puerto Rican associations in the Mexican cohort and vice versa. To account for the fact that we are replicating eight total results across both populations, we used a Bonferroni corrected p-value threshold equal to  $.05/8 = 6.25 \times 10^{-3}$ . The interaction of rs4312379 and rs4312379 with ancestry in the Puerto Ricans replicated in the Mexicans. Furthermore, there was a highly significant enrichment of low p-values in the replication study among the discovery results (permutation  $p < 1 \times 10^{-4}$ ). Furthermore, 5 out of the 6 non-replicating results have a p-value less than 0.05 (binomial test  $p < 1.8 \times 10^{-6}$ ). The results

of the permutation and binomial test suggests that the interactions that did not replicate are likely to do so with bigger sample sizes. It is important to note that replicated interactions and the enrichment for low p-values do not necessarily indicate that the same genetic or environmental covariates are interacting with the genetic locus in both populations. The covariates correlated with  $\theta_{EUR}$  in one population are not necessarily those correlated with  $\theta_{EUR}$  in the other population. There may be correlations which exist in both populations but  $\theta_{EUR}$  serves as a proxy for all such correlated covariates and therefore should not be necessarily viewed as a proxy for any specific one. Overall, our results from the GALA II (methylation) cohort suggest there are both genetic and environmental variables contributing to epistasis that have yet to be discovered in admixed individuals.

#### IV. Discussion and Conclusions

For many disease architectures, interactions are believed to be a major component of missing heritability[38]. Finding new interactions has proven to be difficult for logistical, statistical, biological, and computational reasons. In this study, we have demonstrated that in admixed populations, testing for  $G \times \theta$  interactions can be leveraged to overcome some of the difficulties typically encountered when searching for interactions. The computational cost is minimal and has the same order as running a standard GWAS.

One drawback of our method is that it does not identify which covariate is interacting with a genetic locus. Nevertheless, the approach can show whether an interaction effect exists in a given dataset and if it does exist, our method ensures that an underlying genetic or environmental covariate(s) is correlated with ancestry. Additionally, in the case where there is no marginal effect, our approach identifies new loci and shows that the genetic locus influences the phenotype and exerts its effects through interactions, which has important implications for the genetic architecture of the phenotype. The relative contribution of additive and non-additive genetic effects to variability in molecular phenotypes and disease risk is an important area of investigation, and our approach provides a direct test for detecting non-additive contributions[39].

Environmental covariates are often not consistently measured across cohorts whereas genetic ancestry is nearly perfectly replicable. Testing for the presence of interaction using a nearly

perfectly reproducible covariate may enhance our understanding of the genetic basis of disease and other traits. Our method also provides the additional benefit of not being confounded by interactions between unaccounted-for covariates[40].

Association testing for interaction effects involving continuous environmental exposures in the context of mixed-models remains an open problem. For binary environmental exposures, it has been shown that mixed-models control for population structure nominally better than including genetic ancestry (or principal components) as a covariate[41]. Because it is unclear how mixed-models perform with continuous environmental exposures, especially those correlated with ancestry, in our analyses we took the standard approach of filtering related individuals and including ancestry as a covariate.

It has been shown that 2-step analyses may be more powerful for detecting interactions when exposures are binary [42-44]. However, these studies have primarily been done in a single homogeneous population, and the correct null distribution for the interaction effect must assume that the 2<sup>nd</sup> stage procedure is independent of the marginal effect test-statistic. In real data, using a 2-step approach in conjunction with AITL to test for interactions may be problematic because the interaction effect size will not necessarily be independent of the marginal effect size, as the allele frequency at any SNP will be a function of ancestry in an admixed population. Additionally, only 1 of the interaction results that we report here had a marginal effect ( $p < 0.05$ ) and thus would have been missed by a 2-step approach. Thus, our approach can serve to complement or extend the frequently used 2-step procedure for detecting interaction effects.

Results from our multi-way epistasis simulation analyses and empirical data in cell lines suggest that genetic ancestry is a good proxy for genetic background, since all highly differentiated SNPs across the genome will be correlated with genetic ancestry. Our simulations also demonstrated that genetic ancestry can be a good proxy for an environmental covariate depending on the correlation between the two. However, it may be the case that there are multiple environmental factors interacting with a genetic locus, all of which are correlated with  $\theta$  in differing degrees and effect sizes. Such a situation would mirror what we saw in our multi-way  $G \times G$  simulations where a single interaction may not be detectable by using a traditional  $G \times E$  test, but because  $\theta$  aggregates the

effects of all interacting covariates, AITL would be able to detect it. There are also other contexts in which modeling SNP by  $\theta$  may be useful, such as using variance components. For example, SNP by  $\theta$  interaction terms can be used in a mixed-model framework to test for interaction effects because genetic ancestry is correlated with many genetic markers and environmental covariates[45].

For some traits, there may be systematic differences between ancestral populations in the genetic effects on the trait. In admixed individuals with these ancestral populations, the effect of genetic variation on phenotype will be reflected in the correlation between phenotype and  $\theta$ , thereby affecting epistatic and  $G \times E$  interactions. It will be interesting to see how much of the phenotype-ancestry correlations are due to epistatic and  $G \times E$  interactions.

In our analysis of real data, we discovered gene by  $\theta$  interactions associated with genes that have known interactions. In the GALA II Mexicans, the interaction of rs925736 with ancestry was associated with the methylation of HDAC4, a known histone deacetylase (HDAC). In concert with DNA methylases, HDACs function to regulate gene expression by altering chromatin state[46]. In Europeans, HDACs have been shown to be associated with lung function through direct genetic effects and through environmental interactions[47,48]. For the GALA II Puerto Ricans, rs17091085 showed an interaction associated with the methylation state of SERPINA6. Of note, interaction between birth weight and SERPINA6 has been previously associated with Hypothalamic-Pituitary-Adrenal axis function[49]. Further investigations of our interaction findings are thus warranted.

In the GALA II (methylation) dataset, two of the eight significant associations replicated and, in general, the results had an enrichment of low p-values in the replication dataset. However, we note that if the interactions detected by AITL are multi-way epistasis it is more likely that the results will replicate. This is because most SNPs differentiated in the Mexicans will still be differentiated in the Puerto Ricans, and thus still be correlated with  $\theta$ . If the interactions detected by AITL are  $G \times E$  interactions, then the interactions are less likely to replicate because the same environmental covariate(s) will need to be correlated with ancestry in both groups.

Another caveat is that the Mexicans and Puerto Ricans, though independent, are part of the same study and occasionally technical artifacts, such as issues with genotyping or measuring methylation, can affect downstream analyses of both populations. For our analyses, we have taken

careful quality-control steps to ensure that this is not the case and there is no apparent inflation of test-statistics as demonstrated by our values for genomic control. Future research of interactions using AITL should keep such caveats in mind.

We investigated in detail the potential of single SNP-SNP interactions driving the results that were found both in the gene expression and methylation datasets. As demonstrated by the wide range of  $\lambda_{GC}$  values, we observed that non-linear effects can cause substantial departure from the null when testing for pairwise SNP-SNP interactions. This is especially true when testing for interaction between SNPs  $s$  and  $j$ , where  $s$  has a significant interaction with  $\theta$  and  $j$  is correlated covariates that are also correlated with  $\theta$ . As we saw in the gene expression data, including the significant SNP by  $\theta$  term can properly control for such situations, but its use in standard pairwise interaction tests warrants further investigation.

Our analysis revealed the existence of interactions but does not provide a direct way to determine the covariate that is interacting with a SNP. Further methodological work is required to uncover the exact environmental exposures or genetic loci with which SNPs are interacting. The existence of gene by  $\theta$  interactions in GALA II underscores why modeling interactions should be considered for future association studies and for heritability estimation in admixed populations.

## V. Materials and Methods

Our approach is best illustrated with an example. First consider testing a SNP  $s$  for interaction with an environmental covariate  $E$ .  $\theta$  can serve as a proxy for  $E$  if the two are correlated, even if  $E$  is unknown or unmeasured (see Figure 4a). Now consider testing  $s$  for interaction with a SNP  $j \neq s$  that is highly differentiated in terms of ancestral allele frequencies. For example, a SNP that has a high allele frequency in one ancestral population and a low allele frequency in the other ancestral population.  $\theta$  can be used as a proxy for  $j$  because  $\theta$  and the genotypes of SNP  $j$  will be correlated. Consider the case where  $j$  has a frequency of 0.9 in population 1 and frequency of 0.1 in population 2. Individuals with large values of  $\theta_1$  are more likely to have derived  $j$  from population 1 and on average have greater genotype values at  $j$ . Similarly, individuals with small values of  $\theta_1$  are

more likely to have derived  $j$  from population 2 and on average have smaller genotype values. Thus,  $\theta$  will be correlated with the genotypes of the individuals for highly differentiated SNPs and can serve as a proxy for detecting interactions (see Figure 4b).

Consider an admixed individual  $i$  who derives his or her genome from  $k$  ancestral populations. We denote individual  $i$ 's global ancestry proportion as  $\theta_i = \langle \theta_{i1}, \theta_{i2}, \dots, \theta_{ik} \rangle$ , where  $\sum_k \theta_{ik} = 1$ . The local ancestry of individual  $i$  at a SNP  $s$  is denoted as  $\gamma_{ais} \in \{0, 1, 2\}$  and is equal to the number of alleles from ancestry  $a \in \{1 \dots k\}$  inherited at SNP  $s$ . Current methods allow us to estimate ancestry directly from genotype data both globally and at specific SNPs [9,50,51]. We denote the genotype of an individual  $i$  at SNP  $s$  as  $g_{is} \in \{0, 1, 2\}$  and the corresponding phenotype as  $y_i$ .

In this work, we model continuous phenotypes in an additive linear regression framework. Assuming  $n$  (unrelated) individuals, define  $\vec{y}$  to be the vector of all individuals' phenotypes. The model for the phenotype is then

$$\vec{y} = \mathbf{X}\vec{\beta} + \vec{\epsilon}$$

where  $\vec{\epsilon} \sim \mathcal{N}(0, \sigma)$  is a  $n \times 1$  vector of error terms,  $\mathbf{X}$  is a  $n \times v$  matrix of  $v$  covariates, and  $\vec{\beta}$  is a  $v \times 1$  vector of the covariate effect sizes. We note that in our notation  $\vec{v}^2 = \vec{v}^T \vec{v}$  for a vector  $\vec{v}$ . Assuming independence, the likelihood under this model is:

$$L = \left( \frac{1}{\sigma\sqrt{2\pi}} \right)^n \exp \left( -\frac{1}{2\sigma^2} (\vec{y} - \mathbf{X}\vec{\beta})^2 \right)$$

We can compute the log-likelihood ratio statistic ( $D$ ) using a maximum likelihood approach:

$$D = -2 (\log L_1 - \log L_0) = -2 \left( n \log(\hat{\sigma}_{L_1}) + \frac{(\vec{y} - \mathbf{X}\hat{\beta}_{L_1})^2}{2\hat{\sigma}_{L_1}^2} \right) + 2 \left( n \log(\hat{\sigma}_{L_0}) + \frac{(\vec{y} - \mathbf{X}\hat{\beta}_{L_0})^2}{2\hat{\sigma}_{L_0}^2} \right)$$

We note that for a case-control phenotype we would use the following likelihood and log-likelihood ratio statistic:

$$L = \prod_{i=1}^n \left[ \frac{1}{1 + e^{-X_i \beta}} \right]^{y_i} \left[ 1 - \frac{1}{1 + e^{-X_i \beta}} \right]^{1-y_i}$$

$$D = -2 (\log L_1 - \log L_0)$$

$$= -2 \left( \sum_{i=1}^n -\log(1) + e^{-X_i \hat{\beta}_{L_1}} + \sum_{i=1}^n y_i (X_i \hat{\beta}_{L_1}) \right) \\ + 2 \left( \sum_{i=1}^n -\log(1) + e^{-X_i \hat{\beta}_{L_0}} + \sum_{i=1}^n y_i (X_i \hat{\beta}_{L_0}) \right)$$

where  $X_i$  is the  $i$ -th row of the matrix  $\mathbf{X}$ , which correspond to the covariates of individual  $i$ .

For linear regression, the maximum likelihood estimator (MLE) of the effect sizes is  $\hat{\beta} = (\mathbf{X}^T \mathbf{X})^{-1} \mathbf{X}^T \vec{y}$ , and the MLE of the error variance is  $\hat{\sigma}^2 = \frac{1}{n} (\vec{y} - \mathbf{X} \hat{\beta})^2$ . Here,  $L_1$  is the likelihood under the alternative and  $L_0$  is the likelihood under the null.  $(\hat{\beta}_{L_1}, \hat{\sigma}_{L_1}^2)$  and  $(\hat{\beta}_{L_0}, \hat{\sigma}_{L_0}^2)$  are the effect sizes and error variance estimates that maximize the respective likelihoods.  $D$  is distributed as  $\chi^2$  with  $k$  degrees of freedom ( $df$ ), where  $k$  is the number of parameters constrained under the null.

### 1-df Ancestry Interaction Test (AIT)

The first test we present is the standard direct test of interaction. We test for a SNP's interaction with  $\theta$  instead of an environmental covariate or another genotype. Let  $\vec{g}_s = \langle g_{1s} \dots g_{ns} \rangle$  be the vector of the individuals' genotypes at SNP  $s$ ,  $\vec{\theta}_a = \langle \theta_{1a} \dots \theta_{na} \rangle$  be the vector of their global ancestries for ancestry  $a$ , and  $\vec{g}_s \times \vec{\theta}_a$  be the vector of interaction terms which result from the component-wise multiplication of the genotype and global ancestry vectors. We test the alternative hypothesis  $(\hat{\beta}_{G \times \theta} \neq 0)$  against the null hypothesis  $(\hat{\beta}_{G \times \theta} = 0)$ .

$$H_1: \vec{y} = \vec{g}_s + \vec{g}_s \times \vec{\theta}_a + \vec{\theta}_a$$

$$H_0: \vec{y} = \vec{g}_s + \vec{\theta}_a$$



In this test of interaction, we test a single ancestry versus the other ancestries that may be present in the population of interest. One parameter is constrained under the null which results in a statistic with  $k=1$  df. Let  $\hat{\beta}_{L_{\{0,1\}}(s)}$ ,  $\hat{\beta}_{L_{\{0,1\}}(G \times \theta)}$ , and  $\hat{\beta}_{L_{\{0,1\}}(\theta)}$  denote the effect sizes of genotype, interaction, and global ancestry under a given hypothesis respectively. The statistic is given below.

$$D = -2 \left( n \log(\hat{\sigma}_{L_1}) + \frac{[\vec{y} - \mathbf{X}(\hat{\beta}_{L_1(s)}, \hat{\beta}_{L_1(G \times \theta)}, \hat{\beta}_{L_1(\theta)})]^2}{2\hat{\sigma}_{L_1}^2} \right) + 2 \left( n \log(\hat{\sigma}_{L_0}) + \frac{[\vec{y} - \mathbf{X}(\hat{\beta}_{L_0(s)}, 0, \hat{\beta}_{L_0(\theta)})]^2}{2\hat{\sigma}_{L_0}^2} \right)$$

where  $\mathbf{X}$  is an  $n \times 3$  matrix composed of  $\vec{g}_s$ ,  $\vec{\theta}_a$ , and  $\vec{g}_s \times \vec{\theta}_a$  as columns.

### 1-df Ancestry Interaction Test with Local Ancestry (AITL)

Given that the individuals we analyze in this work are assumed to be admixed, there is potential for confounding due to differential LD. An interaction that is not driven by biology could occur due to the possibility that a causal variant may be better tagged by a SNP being tested on one ancestral background versus another (See Figure 4c). We account for the different LD patterns on varying ancestral backgrounds by including local ancestry as an additional covariate in AITL. By including local ancestry, we assume that the SNP being tested is on the same local ancestry block as the causal SNP that it may be tagging. Such an assumption is reasonable because admixture in populations such as Latinos and African Americans are relatively recent events and their genomes have not undergone many recombination events. As a result, local ancestry blocks on average stretch for several hundred kilobases[52,53].

Let  $\vec{\gamma}_{as} = \langle \gamma_{a1s} \dots \gamma_{a1s} \rangle$  be the vector of local ancestry calls for all individuals for ancestry  $a$  and let  $\vec{g}_s \times \vec{\gamma}_{as}$  be the interaction terms from piecewise multiplication of the two vectors. We use the following alternative and null hypotheses:

$$H_1: \vec{y} = \vec{g}_s + \vec{g}_s \times \vec{\theta}_a + \vec{\theta}_a + \vec{\gamma}_{as} + \vec{g}_s \times \vec{\gamma}_{as}$$

$$H_0: \vec{y} = \vec{g}_s + \vec{\theta}_a + \vec{\gamma}_{as} + \vec{g}_s \times \vec{\gamma}_{as}$$

Here we are testing for an interaction effect, i.e.  $\hat{\beta}_{G \times \theta} \neq 0$ , and constrain one parameter under the null resulting in a statistic with  $k=1$  df. Let  $\hat{\beta}_{L_{\{0,1\}}(G \times \gamma)}$  and  $\hat{\beta}_{L_{\{0,1\}}(\gamma)}$  denote the effect sizes of the interaction between genotype and local ancestry and just local ancestry, respectively. The log likelihood ratio statistic is given by

$$D = -2 \left( n \log(\hat{\sigma}_{L_1}) + \frac{[\vec{y} - \mathbf{X} \langle \hat{\beta}_{L_1(s)}, \hat{\beta}_{L_1(G \times \theta)}, \hat{\beta}_{L_1(\theta)}, \hat{\beta}_{L_1(\gamma)}, \hat{\beta}_{L_1(G \times \gamma)} \rangle]^2}{2\hat{\sigma}_{L_1}^2} \right) + 2 \left( n \log(\hat{\sigma}_{L_0}) + \frac{[\vec{y} - \mathbf{X} \langle \hat{\beta}_{L_0(s)}, 0, \hat{\beta}_{L_0(\theta)}, \hat{\beta}_{L_0(\gamma)}, \hat{\beta}_{L_0(G \times \gamma)} \rangle]^2}{2\hat{\sigma}_{L_0}^2} \right)$$

where  $\mathbf{X}$  is an  $n \times 5$  matrix composed of  $\vec{g}_s$ ,  $\vec{\theta}_a$ ,  $\vec{g}_s \times \vec{\theta}_a$ ,  $\vec{\gamma}_{as}$ , and  $\vec{g}_s \times \vec{\gamma}_{as}$  as columns. All of these test-statistics are straightforwardly modified to jointly incorporate several ancestries in the case of multi-way admixed populations.

### Standard Pairwise Test of Interaction and Controlling Confounding in Admixed Populations

Here we present the standard approach for testing for interaction between two SNPs. We use the following alternative and null hypotheses.

$$H_1: \vec{y} = \vec{g}_1 + \vec{g}_2 + \vec{g}_1 \times \vec{g}_2 + \vec{\theta}_a$$

$$H_0: \vec{y} = \vec{g}_1 + \vec{g}_2 + \vec{\theta}_a$$

If AITL is significant for a given SNP  $s$ , then any SNP  $j$  tested for interaction with  $s$  may be biased if  $j$  is correlated with covariates that are also correlated with  $\theta$ . Furthermore, if the effects of the covariates correlated with  $\theta$  are non-linear then controlling for the main effects of the SNPs and ancestry will account for the non-linear effects. We thus, propose the use of the following alternative and null hypotheses.

$$H_1: \vec{y} = \vec{g}_s + \vec{g}_j + \vec{g}_s \times \vec{g}_j + \vec{\theta}_a + \vec{g}_s \times \vec{\theta}_a$$

$$H_0: \vec{y} = \vec{g}_s + \vec{g}_j + \vec{\theta}_a + \vec{g}_s \times \vec{\theta}_a$$

We note that the utility of this test will require further investigation (see Discussion).

## Simulation Framework

For all our simulations, we simulated 2-way admixed individuals. Global ancestry for ancestral population 1 ( $\theta_1$ ) was drawn from a normal distribution with  $\mu = 0.7$  and  $\sigma = 0.2$ . Individuals with  $\theta_1 > 1$  or  $\theta_1 < 0$  were assigned a value of 1 or 0, respectively. We simulated phenotypes of individuals to investigate our method in four different scenarios:  $G \times E$  interactions, pairwise epistatic interactions, multi-way epistatic interactions, and false positive interactions due to local differential tagging.

To simulate phenotypes under the situation of a  $G \times E$  interaction, we simulated a single SNP. For each individual  $i$ , we assigned the local ancestry or the number of alleles derived from population 1 ( $\gamma_{ai}$ ) for each haplotype by performing two binomial trials with the probability of success equal to  $\theta_{i1}$ . We then drew ancestry specific allele frequencies following the Balding-Nichols model by assuming a  $F_{ST} = 0.16$  and drawing two ancestral frequencies,  $p_1$  and  $p_2$ , from the following beta distribution[54].

$$p_1, p_2 \sim \text{Beta}\left(\frac{p(1 - F_{ST})}{F_{ST}}, \frac{(1 - p)(1 - F_{ST})}{F_{ST}}\right)$$

where  $p$  is the underlying MAF in the entire population and is set to 0.2. Genotypes were drawn using a binomial trial for each local ancestry haplotype with the probability of success equal to  $p_1$  or  $p_2$  for values of  $\gamma_{ai} = 0$  or 1, respectively. Environmental covariates correlated with  $\theta_1$ ,  $E_i$  were generated for each individual  $i$  by drawing from a normal distribution  $\mathcal{N}(\mu = \theta_{i1}, \sigma_E)$ , where  $\sigma_E$  is the standard deviation of the environmental covariates.  $\sigma_E$  was varied from 0 to 5 in increments of 0.005 to create  $E_i$ 's that were correlated with individuals' global ancestries in varying degrees. We generated phenotypes for individuals assuming only an interaction effect by drawing from a normal distribution,  $\mathcal{N}(\mu = \beta_{G \times E} \times g_{i1} \times E_i, \sigma = 1)$  for a given interaction effect size ( $\beta_{G \times E}$ ).

To simulate phenotypes based on pairwise epistatic interactions, we simulated two SNPs. At both SNPs, we assigned the local ancestry values as described for the  $G \times E$  case. We assigned genotypes for individuals at the first SNP assuming an allele frequency of 0.5 for both populations and drawing from two binomial trials. We assigned genotypes at the second SNP over a wide range of ancestry specific allele frequencies to simulate different levels of SNP differentiation. Ancestry specific allele frequencies were initially  $p_1 = p_2 = 0.5$  and iteratively increasing  $p_1$  by 0.005 while simultaneously decreasing  $p_2$  by 0.005 until  $p_1 = 0.05$  and  $p_2 = 0.95$ . Genotypes at the second SNP were drawn using the same approach described for  $G \times E$ . Using the simulated genotypes, phenotypes were drawn from a normal distribution,  $\mathcal{N}(\mu = \beta_{G \times G} \times g_{i1} \times g_{i2}, \sigma = 1)$ , where  $g_{is}$  is the genotype for individual  $i$  at the simulated SNP  $s$ .

To simulate phenotypes based on multi-way epistatic interactions, we simulated a SNP  $z$  and  $m$  (independent) SNPs with pairwise interactions with  $z$ . Genotypes for individuals at SNP  $z$  were assigned assuming an allele frequency of 0.5 for both populations and drawing from two binomial trials. Genotypes at the  $m$  interacting SNPs were assigned in the same manner as the 2<sup>nd</sup> SNP in the pairwise interaction simulations. Using the simulated genotypes, phenotypes were drawn from a normal distribution,  $\mathcal{N}(\mu = \sum_{x=1}^m \beta_{G \times G} \times g_{iz} \times g_x, \sigma = 1)$  where  $g_{is}$  is the genotype for individual  $i$  at the simulated SNP  $s$ .

To simulate the scenario of differential LD on different ancestral backgrounds leading to false positives, we simulated phenotypes based on a single causal SNP that was tagged by another SNP. At both SNPs, local ancestries were assigned as described previously and genotypes were drawn using ancestry specific allele frequencies. Ancestral allele frequencies were assigned such that the average  $r^2$  between the causal and tag SNP was 0.272 on the background of ancestral population 1 and 0.024 on the background of ancestral population 2. Thus, the tag SNP was only a tag on the population1 background and not on the population 2 background. Phenotypes were drawn from a normal distribution,  $\mathcal{N}(\mu = \beta_{Causal} \times g_{ic}, \sigma = 1)$ , assuming no interaction and  $\beta_{Causal} = 0.7$ , where  $g_{ic}$  is the genotype of individual  $i$  at the causal variant.

We implemented our approach in an R package (GxTheta), which is available for download at <http://www.scandb.org/newinterface/GxTheta.html>

## **Ancestry Inference**

Global ancestry inference was done using ADMIXTURE [9] and local ancestry inference was done using LAMP-LD [55]. CEU and YRI from 1000 Genomes Phase 3 [56] were used as the European and African reference panels. For the Native American reference panels, 95 Native Americans genotyped on the Axiom LAT1 array were used[57].

## **Filtering for Related Individuals**

All analyses in real data were filtered for related individuals due to the possibility of cryptic relatedness causing false positives. To filter for related individuals, we estimated kinship coefficients between all pairs of individuals using REAP [58]. We defined two individuals as related if they had a kinship coefficient greater than 0.025. For a pair of related individuals, we removed the one with a greater number of other individuals to whom he or she was related. In the case of a tie, we removed one of the pair at random.

## **Data Normalization**

### *Gene Expression Normalization*

Gene expression data (see Results) were first standardized for each gene such that mean expression was 0 and variance was 1. We then computed a covariance matrix of individual's expression values and performed PCA on the covariance matrix. Residuals were computed for all expression values by adjusting for the top 10 principal components and the mean for each gene was added back to the residuals. Due to the high dynamic range of gene expression compared to methylation we conservatively chose to additionally perform quantile normalization. We then sorted the gene expression residuals and used the quantiles of their rank order to draw new expression values from a normal distribution,  $\mathcal{N}(\mu = 0, \sigma = 1)$ , by using the inverse cumulative density function<sup>24,25</sup>.

## *Methylation Data Normalization*

Raw methylation values (see Results) were first normalized using Illumina's control probe scaling procedures. All probes with median methylation less than 1% or greater than 99% were removed and the remaining probes were logit-transformed as previously described[59]. To control for extreme outliers, we truncated the distribution of methylation values. For a given probe, we first computed the mean and standard deviation of the methylation values. We then set any methylation values deviating more than 2.58 standard deviations from the mean to the methylation value corresponding to the 99.5<sup>th</sup> quantile.

## **Availability of Supporting Data**

The Coriell data is available from dbGAP under accession number phs000211.v1.p1. The GALA and SAGE data is available by emailing the study organizers at <https://pharm.ucsf.edu/gala/contact>.

## **Competing Interests**

The authors declare that they have no competing interests.

## **Authors' Contributions**

DSP, IE, EK, EE, EH and NZ designed research. DSP, IE, EK, ERG, and NZ performed research. DSP, IE, EK, EE, CE, CRG, JMG, EG, HA, CJY, EE, EH, and NZ contributed new reagents/analytic tools. DSP, ERG, and NZ wrote the manuscript. All authors read and approved the final manuscript.

## **Description of Additional Data Files**

The following data are available with the online version of this paper. The Supplemental contains QQ-plots for the simulations and real analyses performed as well as a table containing p-values for the 2-component ancestry analysis of the GALA methylation data.

## **Acknowledgements**

We would like to thank Lancelote Leong for his helpful manuscript comments.

## References

1. Hemani G, Shakhbazov K, Westra H-J, Esko T, Henders AK, Mcrae AF, et al. Detection and replication of epistasis influencing transcription in humans. *Nature*. Nature Publishing Group; 2014 Apr 10;508(7495):249–53.
2. Rouhani F, Kumasaka N, de Brito MC, Bradley A, Vallier L, Gaffney D. Genetic Background Drives Transcriptional Variation in Human Induced Pluripotent Stem Cells. Gibson G, editor. *PLoS Genet*. 2014;10(6):e1004432.
3. Kang EY, Han B, Furlotte N, Joo JW, Shih D, Davis RC, et al. Meta-Analysis Identifies Gene-by-Environment Interactions as Demonstrated in a Study of 4,965 Mice. Gibson G, editor. *PLoS Genet*. Public Library of Science; 2014 Jan 9;10(1):e1004022.
4. Jemal A, Bray F, Center MM, Ferlay J, Ward E, Forman D. Global cancer statistics. *CA Cancer J Clin*. 2011 Mar;61(2):69–90.
5. Lee M, Raj T, Castillo IW. ImmVar Project: Genetic architecture of leukocyte gene expression in healthy humans. *JOURNAL OF ...*; 2012.
6. Manolio TA, Collins FS, Cox NJ, Goldstein DB, Hindorff LA, Hunter DJ, et al. Finding the missing heritability of complex diseases. *Nature*. Nature Publishing Group; 2009 Oct 8;461(7265):747–53.
7. Eichler EE, Flint J, Gibson G, Kong A, Leal SM. Missing heritability and strategies for finding the underlying causes of complex disease. *Nature Reviews ....* 2010.
8. Seldin MF, Pasaniuc B, Price AL. New approaches to disease mapping in admixed populations. *Nature Reviews Genetics*. Nature Publishing Group; 2011 Aug 1;12(8):523–8.
9. Alexander DH, Novembre J, Lange K. Fast model-based estimation of ancestry in unrelated individuals. *Genome Res*. Cold Spring Harbor Lab; 2009 Sep 1;19(9):1655–64.
10. Burchard EG, Ziv E, Coyle N, Gomez SL. The importance of race and ethnic background in biomedical research and clinical practice. *New England Journal ....* 2003.
11. Kumar R, Seibold MA, Aldrich MC, Williams LK, Reiner AP, Colangelo L, et al. Genetic Ancestry in Lung-Function Predictions. *N Engl J Med*. 2010 Jul 22;363(4):321–30.
12. Kumar R, Nguyen EA, Roth LA, Oh SS, Gignoux CR, Huntsman S, et al. Factors associated with degree of atopy in Latino children in a nationwide pediatric sample: The Genes-environments and Admixture in Latino Asthmatics (GALA II) study. *J Allergy Clin Immunol*. Elsevier; 2013 May 16;132(4):896–905.e1.
13. Price AL, Patterson N, Hancks DC, Myers S, Reich D, Cheung VG, et al. Effects of cis and trans Genetic Ancestry on Gene Expression in African Americans. Gibson G, editor. *PLoS Genet*. Public Library of Science; 2008 Dec 5;4(12):e1000294.
14. Shaffer JR, Kammerer CM, Reich D, McDonald G, Patterson N, Goodpaster B, et al. Genetic markers for ancestry are correlated with body composition traits in older African Americans. *Osteoporos Int*. Springer-Verlag; 2007;18(6):733–41.
15. Florez JC, Price AL, Campbell D, Riba L, Parra MV, Yu F, et al. Strong Association of Socioeconomic Status and Genetic Ancestry in Latinos: Implications for Admixture Studies of

- 623 Type 2 Diabetes. In: Racial Identities, Genetic Ancestry, and Health in South America. Palgrave  
624 Macmillan US; 2011. pp. 137–53.
- 625 16. Reiner AP, Carlson CS, Ziv E, Iribarren C, Jaquish CE, Nickerson DA. Genetic ancestry,  
626 population sub-structure, and cardiovascular disease-related traits among African-American  
627 participants in the CARDIA Study. *Hum Genet. Springer-Verlag*; 2007;121(5):565–75.
- 628 17. Sanchez E, Webb RD, Rasmussen A, Kelly JA, Riba L, Kaufman KM, et al. Genetically  
629 determined Amerindian ancestry correlates with increased frequency of risk alleles for  
630 systemic lupus erythematosus. *Arthritis & Rheumatism. Wiley Subscription Services, Inc., A  
631 Wiley Company*; 2010 Dec 1;62(12):3722–9.
- 632 18. Ziv E, John EM, Choudhry S, Kho J, Lorizio W, Pérez-Stable EJ, et al. Genetic Ancestry and Risk  
633 Factors for Breast Cancer among Latinas in the San Francisco Bay Area. *Cancer Epidemiol  
634 Biomarkers Prev. American Association for Cancer Research*; 2006 Oct 1;15(10):1878–85.
- 635 19. Cheng C-Y, Reich D, Haiman CA, Tandon A, Patterson N, Elizabeth S, et al. African Ancestry and  
636 Its Correlation to Type 2 Diabetes in African Americans: A Genetic Admixture Analysis in  
637 Three U.S. Population Cohorts. Atkin SL, editor. *PLoS ONE. Public Library of Science*; 2012  
638 Mar 16;7(3):e32840.
- 639 20. Choudhry S, Burchard EG, Borrell LN, Tang H, Gomez I, Naqvi M, et al. Ancestry–Environment  
640 Interactions and Asthma Risk among Puerto Ricans. *Am J Respir Crit Care Med [Internet].  
641 American Thoracic Society*; 2006 Nov 15;174(10):1088–93. Available from:  
642 <http://www.atsjournals.org/doi/abs/10.1164/rccm.200605-596OC>
- 643 21. Spielman RS, Bastone LA, Burdick JT, Morley M, Ewens WJ, Cheung VG. Common genetic  
644 variants account for differences in gene expression among ethnic groups. *Nat Genet. Nature  
645 Publishing Group*; 2007 Feb 1;39(2):226–31.
- 646 22. Peralta CA, Risch N, Lin F, Shlipak MG, Reiner A, Ziv E, et al. The Association of African  
647 Ancestry and Elevated Creatinine in the Coronary Artery Risk Development in Young Adults  
648 (CARDIA) Study. *Am J Nephrol. Karger Publishers*; 2009 Dec 21;31(3):202–8.
- 649 23. Galanter JM, Gignoux CR, Oh SS, Torgerson D, Pino-Yanes M, Thakur N, et al. Methylation  
650 Analysis Reveals Fundamental Differences Between Ethnicity and Genetic Ancestry. *bioRxiv.  
651 Cold Spring Harbor Labs Journals*; 2016 Jan 15;:036822.
- 652 24. Population-specificity of human DNA methylation. 2012.
- 653 25. Delude CM. Deep phenotyping: The details of disease. *Nature. Nature Publishing Group*; 2015  
654 Nov 5;527(7576):S14–5.
- 655 26. Vimalaswaran KS, Berry DJ, Lu C, Tikkanen E, Pilz S, Hiraki LT, et al. Causal Relationship  
656 between Obesity and Vitamin D Status: Bi-Directional Mendelian Randomization Analysis of  
657 Multiple Cohorts. Minelli C, editor. *PLOS Med. Public Library of Science*; 2013 Feb  
658 5;10(2):e1001383.
- 659 27. Grundberg E, Small KS, Hedman ÅK, Nica AC, Buil A, Keildson S, et al. Mapping cis- and trans-  
660 regulatory effects across multiple tissues in twins. *Nat Genet. Nature Publishing Group*; 2012  
661 Oct 1;44(10):1084–9.
- 662 28. Aschard H, Lutz S, Maus B, Duell EJ, Fingerlin TE, Chatterjee N, et al. Challenges and  
663 opportunities in genome-wide environmental interaction (GWEI) studies. *Hum Genet.*



- 664 Springer-Verlag; 2012;131(10):1591–613.
- 665 29. Aschard H, Gusev A, Brown R, Pasaniuc B. Leveraging local ancestry to detect gene-gene  
666 interactions in genome-wide data. BMC Genetics. BioMed Central Ltd; 2015 Oct 24;16(1):124.
- 667 30. De R, Hu T, Moore JH, Gilbert-Diamond D. Characterizing gene-gene interactions in a  
668 statistical epistasis network of twelve candidate genes for obesity. BioData Mining. BioMed  
669 Central; 2015;8(1):1–16.
- 670 31. Ritchie MD, Hahn LW, Roodi N, Bailey LR, Dupont WD, Parl FF, et al. Multifactor-  
671 Dimensionality Reduction Reveals High-Order Interactions among Estrogen-Metabolism  
672 Genes in Sporadic Breast Cancer. The American Journal of Human Genetics. 2001  
673 Jul;69(1):138–47.
- 674 32. Wong MY, Day NE, Luan JA, Chan KP, Wareham NJ. The detection of gene-environment  
675 interaction for continuous traits: should we deal with measurement error by bigger studies or  
676 better measurement? Int J Epidemiol. 2003 Feb;32(1):51–7.
- 677 33. Devlin B, Roeder K. Genomic Control for Association Studies. Biometrics [Internet]. Blackwell  
678 Publishing Ltd; 2004 May 25;55(4):997–1004. Available from:  
679 <http://doi.wiley.com/10.1111/j.0006-341X.1999.00997.x>
- 680 34. Simon-Sanchez J, Scholz S, Fung H-C, Matarin M, Hernandez D, Gibbs JR, et al. Genome-wide  
681 SNP assay reveals structural genomic variation, extended homozygosity and cell-line induced  
682 alterations in normal individuals. Hum Mol Genet. Oxford University Press; 2007 Jan  
683 1;16(1):1–14.
- 684 35. Martin AR, Costa HA, Lappalainen T, Henn BM, Kidd JM, Yee M-C, et al. Transcriptome  
685 Sequencing from Diverse Human Populations Reveals Differentiated Regulatory Architecture.  
686 Gibson G, editor. PLoS Genet. Public Library of Science; 2014 Aug 14;10(8):e1004549.
- 687 36. Borrell LN, Nguyen EA, Roth LA, Oh SS, Tcheurekdjian H, Sen S, et al. Childhood Obesity and  
688 Asthma Control in the GALA II and SAGE II Studies. dx.doi.org. American Thoracic Society;  
689 2013. 6 p.
- 690 37. Torgerson DG, Gignoux CR, Galanter JM, Drake KA, Roth LA, Eng C, et al. Case-control  
691 admixture mapping in Latino populations enriches for known asthma-associated genes. J  
692 Allergy Clin Immunol. 2012 Jul;130(1):76–82.e12.
- 693 38. Eichler EE, Flint J, Gibson G, Kong A, Leal SM, Moore JH, et al. Missing heritability and  
694 strategies for finding the underlying causes of complex disease. Nature Reviews Genetics.  
695 Nature Publishing Group; 2010 Jun 1;11(6):446–50.
- 696 39. Powell JE, Henders AK, Mcrae AF, Kim J, Hemani G, Martin NG, et al. Congruence of Additive  
697 and Non-Additive Effects on Gene Expression Estimated from Pedigree and SNP Data. Spector  
698 TD, editor. PLoS Genet. Public Library of Science; 2013 May 16;9(5):e1003502.
- 699 40. Keller MC. Gene × Environment Interaction Studies Have Not Properly Controlled for  
700 Potential Confounders: The Problem and the (Simple) Solution. Biological Psychiatry. 2014  
701 Jan;75(1):18–24.
- 702 41. Sul JH, Bilow M, Yang W-Y, Kostem E, Furlotte N, He D, et al. Accounting for Population  
703 Structure in Gene-by-Environment Interactions in Genome-Wide Association Studies Using  
704 Mixed Models. Schork NJ, editor. PLoS Genet. Public Library of Science; 2016 Mar

- 705 4;12(3):e1005849.
- 706 42. Kooperberg C, LeBlanc M. Increasing the power of identifying gene  $\times$  gene interactions in  
707 genome-wide association studies. *Genet Epidemiol*. Wiley Subscription Services, Inc., A Wiley  
708 Company; 2008 Apr 1;32(3):255–63.
- 709 43. Murcray CE, Lewinger JP, Gauderman WJ. Gene-Environment Interaction in Genome-Wide  
710 Association Studies. *Am J Epidemiol*. Oxford University Press; 2009 Jan 15;169(2):219–26.
- 711 44. Hsu L, Jiao S, Dai JY, Hutter C, Peters U, Kooperberg C. Powerful Cocktail Methods for  
712 Detecting Genome-Wide Gene-Environment Interaction. *Genet Epidemiol*. 2012 Apr  
713 1;36(3):183–94.
- 714 45. Yang J, Benyamin B, McEvoy BP, Gordon S, Henders AK, Nyholt DR, et al. Common SNPs  
715 explain a large proportion of the heritability for human height. *Nat Genet*. 2010 Jun  
716 20;42(7):565–9.
- 717 46. Smith ZD, Meissner A. DNA methylation: roles in mammalian development. *Nature Reviews*  
718 *Genetics*. Nature Publishing Group; 2013 Mar 1;14(3):204–20.
- 719 47. Artigas MS, Loth DW, Wain LV, Gharib SA, Obeidat M, Tang W, et al. Genome-wide association  
720 and large-scale follow up identifies 16 new loci influencing lung function. *Nat Genet*. Nature  
721 Publishing Group; 2011 Nov 1;43(11):1082–90.
- 722 48. Liao SY, Lin X, Christiani DC. Gene-environment interaction effects on lung function-a  
723 genome-wide association study within the Framingham heart study. *Environ Health*. 2013.
- 724 49. Anderson LN, Briollais L, Atkinson HC, Marsh JA, Xu J, Connor KL, et al. Investigation of  
725 Genetic Variants, Birthweight and Hypothalamic-Pituitary-Adrenal Axis Function Suggests a  
726 Genetic Variant in the SERPINA6 Gene Is Associated with Corticosteroid Binding Globulin in  
727 the Western Australia Pregnancy Cohort (Raine) Study. Hsu Y-H, editor. *PLoS ONE*. Public  
728 Library of Science; 2014 Apr 1;9(4):e92957.
- 729 50. Baran Y, Pasaniuc B, Sankararaman S, Torgerson DG, Gignoux C, Eng C, et al. Fast and accurate  
730 inference of local ancestry in Latino populations. *Bioinformatics*. Oxford University Press;  
731 2012 May 15;28(10):1359–67.
- 732 51. Sankararaman S, Sridhar S, Kimmel G. Estimating local ancestry in admixed populations. *The*  
733 *American Journal of ...* 2008.
- 734 52. Price AL, Patterson N, Yu F, Cox DR, Waliszewska A, McDonald GJ, et al. A Genomewide  
735 Admixture Map for Latino Populations. *The American Journal of Human Genetics*. 2007  
736 Jun;80(6):1024–36.
- 737 53. Smith MW, Patterson N, Lautenberger JA, Truelove AL, McDonald GJ, Waliszewska A, et al. A  
738 High-Density Admixture Map for Disease Gene Discovery in African Americans. *The American*  
739 *Journal of Human Genetics*. 2004 May;74(5):1001–13.
- 740 54. Balding DJ, Nichols RA. A method for quantifying differentiation between populations at  
741 multi-allelic loci and its implications for investigating identity and paternity. *Human*  
742 *Identification: The Use of DNA Markers*. 1995.
- 743 55. Baran Y, Pasaniuc B, Sankararaman S, Torgerson DG, Gignoux C, Eng C, et al. Fast and accurate  
744 inference of local ancestry in Latino populations. *Bioinformatics*. 2012 May 15;28(10):1359–

745 67.

746 56. Consortium T1GP. An integrated map of genetic variation from 1,092 human genomes.  
747 Nature. Nature Publishing Group; 2012 Nov 1;491(7422):56–65.

748 57. Drake KA, Torgerson DG, Gignoux CR, Galanter JM, Roth LA, Huntsman S, et al. A genome-wide  
749 association study of bronchodilator response in Latinos implicates rare variants. Journal of  
750 Allergy and Clinical Immunology. 2014 Feb;133(2):370–378.e15.

751 58. Thornton T, Tang H, Hoffmann TJ, Ochs-Balcom HM, Caan BJ, Risch N. Estimating kinship in  
752 admixed populations. Am J Hum Genet. 2012 Jul 13;91(1):122–38.

753 59. Du P, Zhang X, Huang C-C, Jafari N, Kibbe WA, Hou L, et al. Comparison of Beta-value and M-  
754 value methods for quantifying methylation levels by microarray analysis. BMC  
755 Bioinformatics. BioMed Central Ltd; 2010 Nov 30;11(1):587.

756

757

## Figure Legends

Figure 1. Power Plots for Pairwise Interaction Simulations.

Power of testing  $G \times \theta$  (a) versus testing pairwise SNPs directly (b) as a function of the difference in the ancestral allele frequencies at a differentiated SNP.

Figure 2. Power Plots for Multi-way Pairwise Interaction Simulations

Power of testing  $G \times \theta$  as a function of the difference in the ancestral allele frequencies for multiple interacting SNPs.

Figure 3. Power Plots for  $G \times E$  Interaction Simulations.

Power of testing  $G \times \theta$  as a function of the correlation between an environmental covariate and genetic ancestry.

Figure 4. Examples of How Genetic Ancestry Can Be A Proxy for Interacting Covariates.

(a) Model of how genetic ancestry  $\theta$  can be correlated with various environmental exposures, some of which affect a phenotype. (b) Example of how the correlation between the probability of an AA genotype (bars 2-4) and values of  $\theta$  (bar 1) increase with higher levels of SNP allele frequency differentiation. In this plot  $p_1$  and  $p_2$  denote the allele frequency of allele A in ancestral populations 1 and 2 respectively. (c) Example of how effect sizes at a tag-SNP may differ due to differential LD on distinct ancestral backgrounds (here, EUR and AFR).

## Tables

**Table 1. Distribution of Ancestry in Coriell and GALA II.**

| Dataset    | $\theta_{EUR}$                  | $\theta_{AFR}$                  | $\theta_{NAM}$                  |
|------------|---------------------------------|---------------------------------|---------------------------------|
| Coriell    | $\mu=0.212$ ,<br>$\sigma=0.021$ | $\mu=0.788$ ,<br>$\sigma=0.021$ | NA                              |
| GALA II MX | $\mu=0.396$ ,<br>$\sigma=0.149$ | $\mu=0.043$ ,<br>$\sigma=0.025$ | $\mu=0.561$ ,<br>$\sigma=0.159$ |
| GALA II PR | $\mu=0.641$ ,<br>$\sigma=0.094$ | $\mu=0.246$ ,<br>$\sigma=0.101$ | $\mu=0.113$ ,<br>$\sigma=0.024$ |

Mean and variance of the global ancestry distributions for each dataset.

**Table 2. GALA II DNA Methylation Analysis Results.**

| GALA II Population | Probe Gene | Probe ID    | rsid       | Distance of SNP to Probe | Marginal p-value | AITL p-value | AITL Replication p-value |
|--------------------|------------|-------------|------------|--------------------------|------------------|--------------|--------------------------|
| MX                 | CNFN       | cg14327995  | rs16975986 | 280795                   | 2.49E-09         | 5.69E-09     | 9.27E-03                 |
| MX                 | C11orf95   | cg16678159  | rs7106153  | 249768                   | 2.58E-01         | 2.52E-08     | 9.39E-02                 |
| MX                 | NA         | cg05697734  | rs1560919  | 13711                    | 1.14E-01         | 2.21E-08     | 8.18E-03                 |
| MX                 | TNK2       | cg01792640  | rs67217828 | 278866                   | 4.49E-01         | 6.38E-09     | 1.43E-02                 |
| MX                 | HDAC4      | cg06533788  | rs925736   | 9548                     | 4.51E-01         | 3.09E-09     | 2.80E-02                 |
| PR                 | NA         | cg07436864* | rs8117083  | 31813                    | 7.46E-02         | 1.34E-09     | 5.34E-03                 |
| PR                 | NA         | cg16803083* | rs4312379  | 63847                    | 3.69E-01         | 2.29E-08     | 2.31E-04                 |
| PR                 | SERPINA6   | cg10025865  | rs17091085 | 247796                   | 6.83E-01         | 2.97E-08     | 8.05E-03                 |

P-values for AITL applied to the methylation data in the GALA II Latinos. MX and PR denote Mexicans and Puerto Ricans respectively in the GALA II population columns. The probe gene column shows the gene that the methylation probe lies in. The marginal column is the p-value for standard linear regression of methylation on genotype while controlling for population structure. \* indicates results that replicated between the Mexicans and Puerto Ricans.

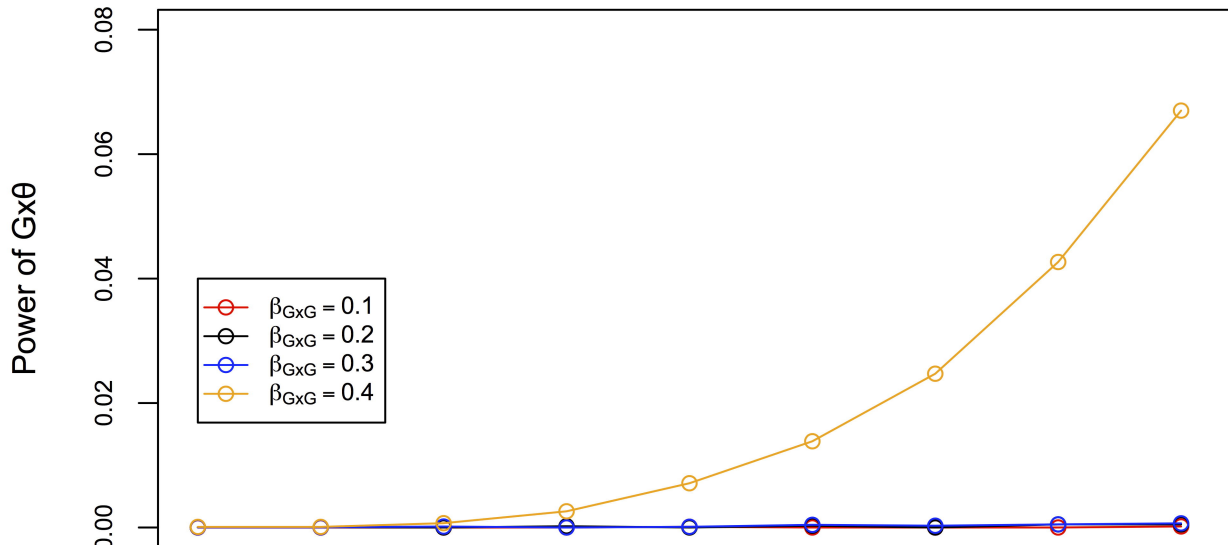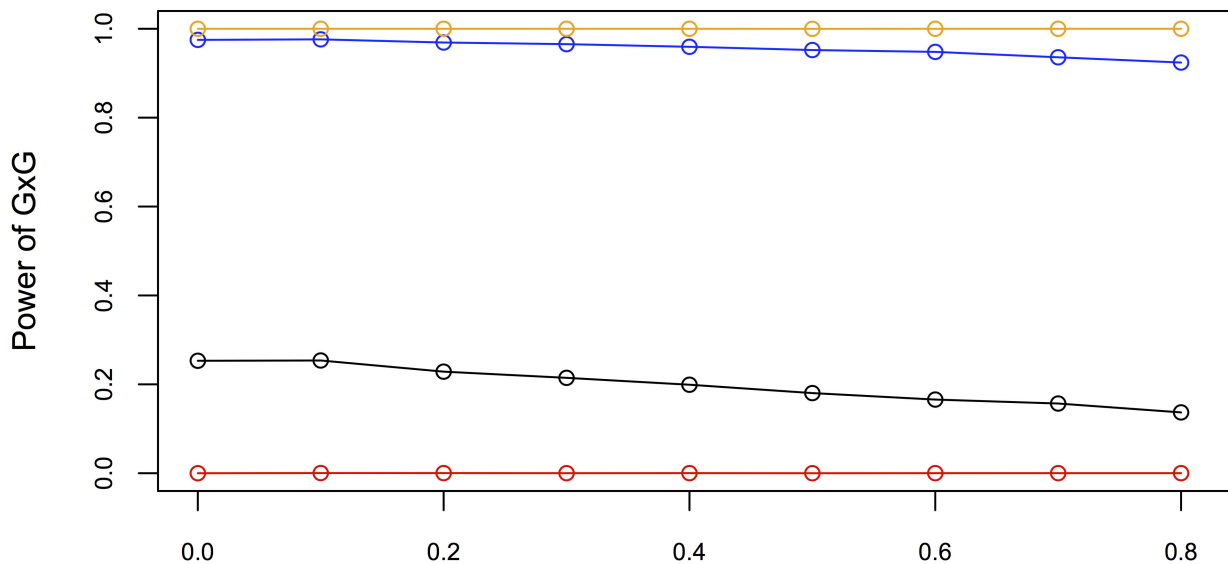

Absolute Difference in Ancestral Freqs. of 2nd SNP

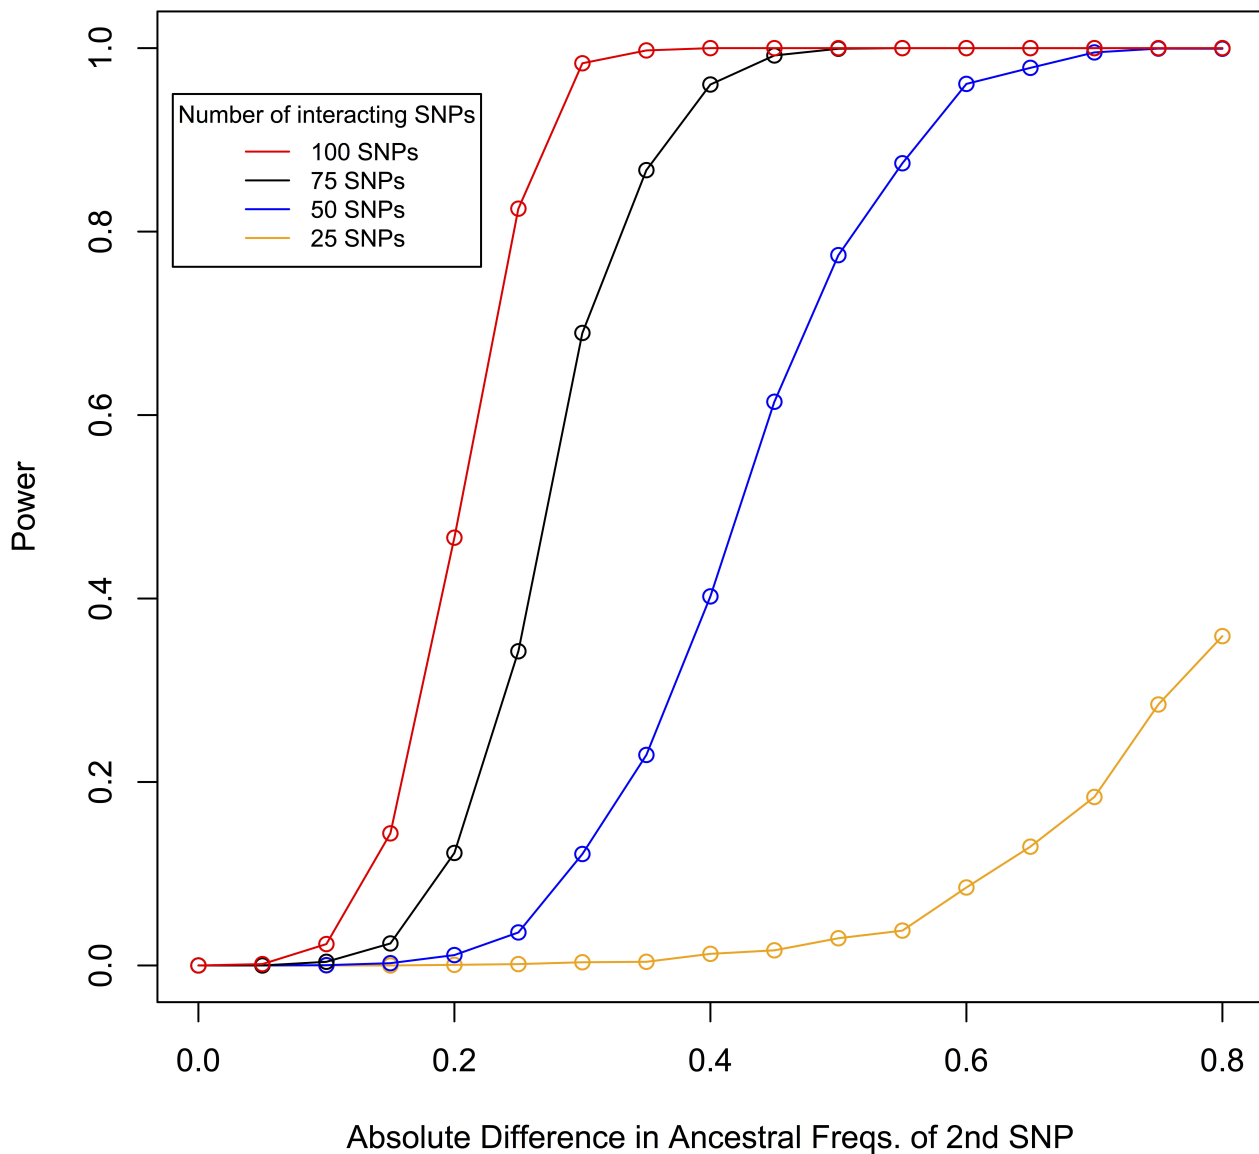

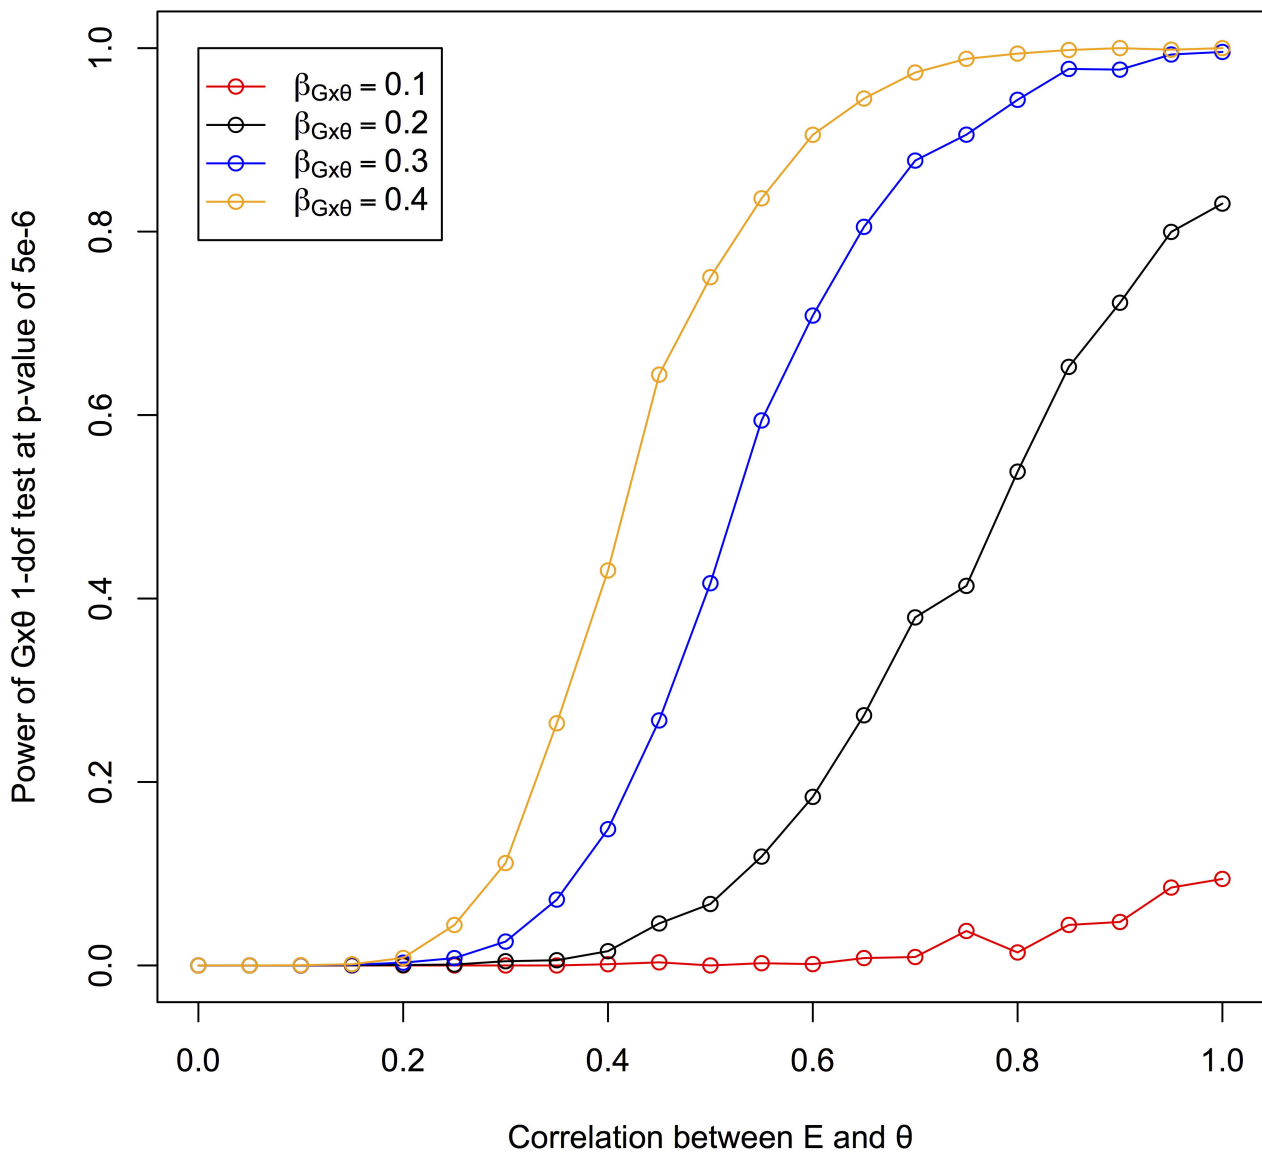



(a)

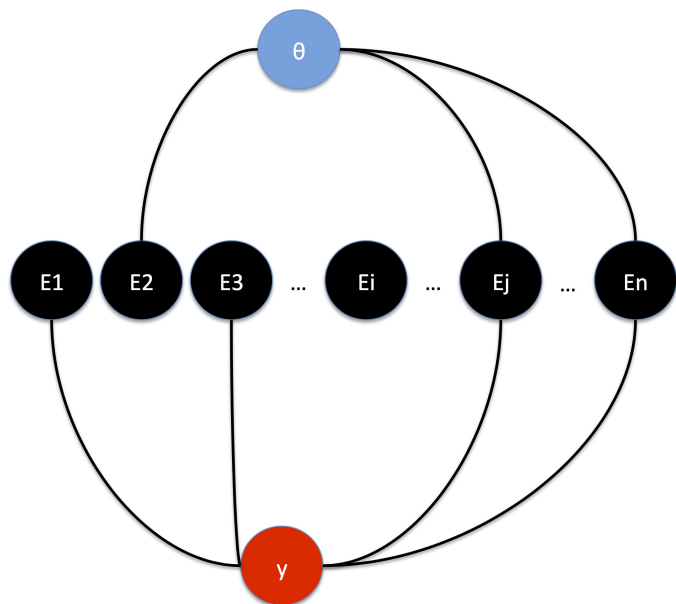

(b)

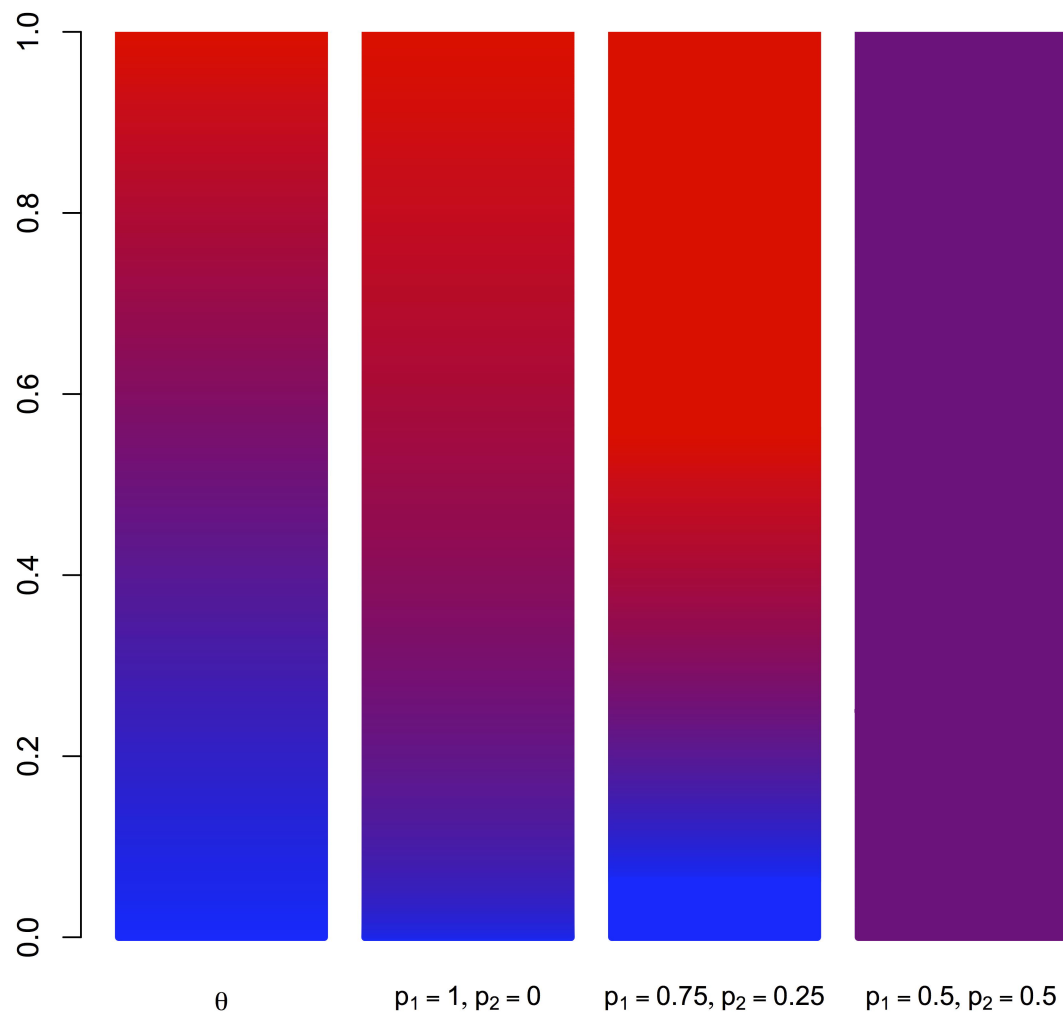

(c)

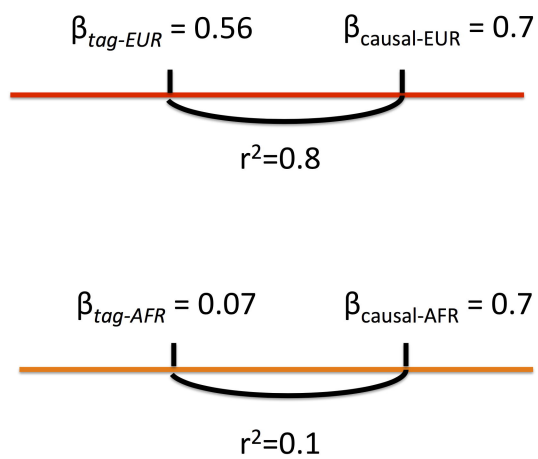

Source: https://www.biorxiv.org/content/10.1101/036640v3.full.pdf
